# Supplementary material for: How to efficiently isolate multiple size ranges of oxidized or hydrogenated milled nanodiamonds
Source: Royal Society of Chemistry journal article supplement (doi:10.1039/d4na00487f), 2024-01-01
Supplement: d4na00487f1.pdf [file d4na00487f1.pdf]

## Supplementary information

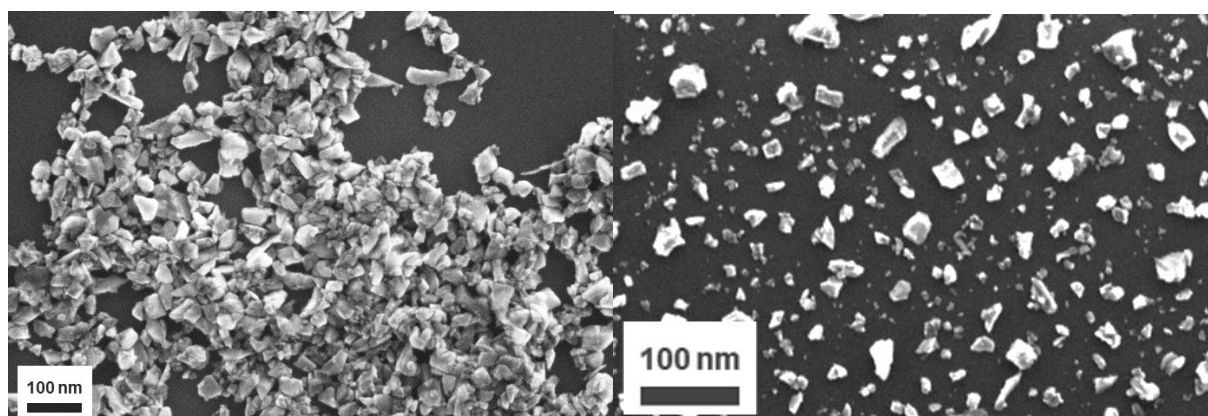

Figure S1 : SEM Pictures of SYP 0-0.1 deposited on a Si substrate by (left) drop cast and (right) layer by layer techniques

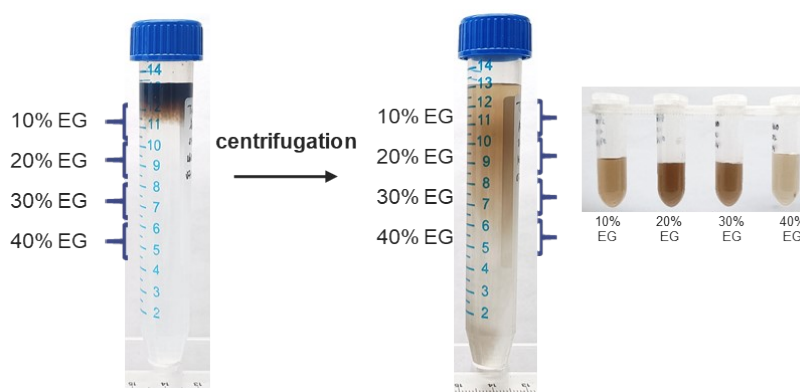

Figure S2 : Schematic diagram of the viscosity gradient technique.

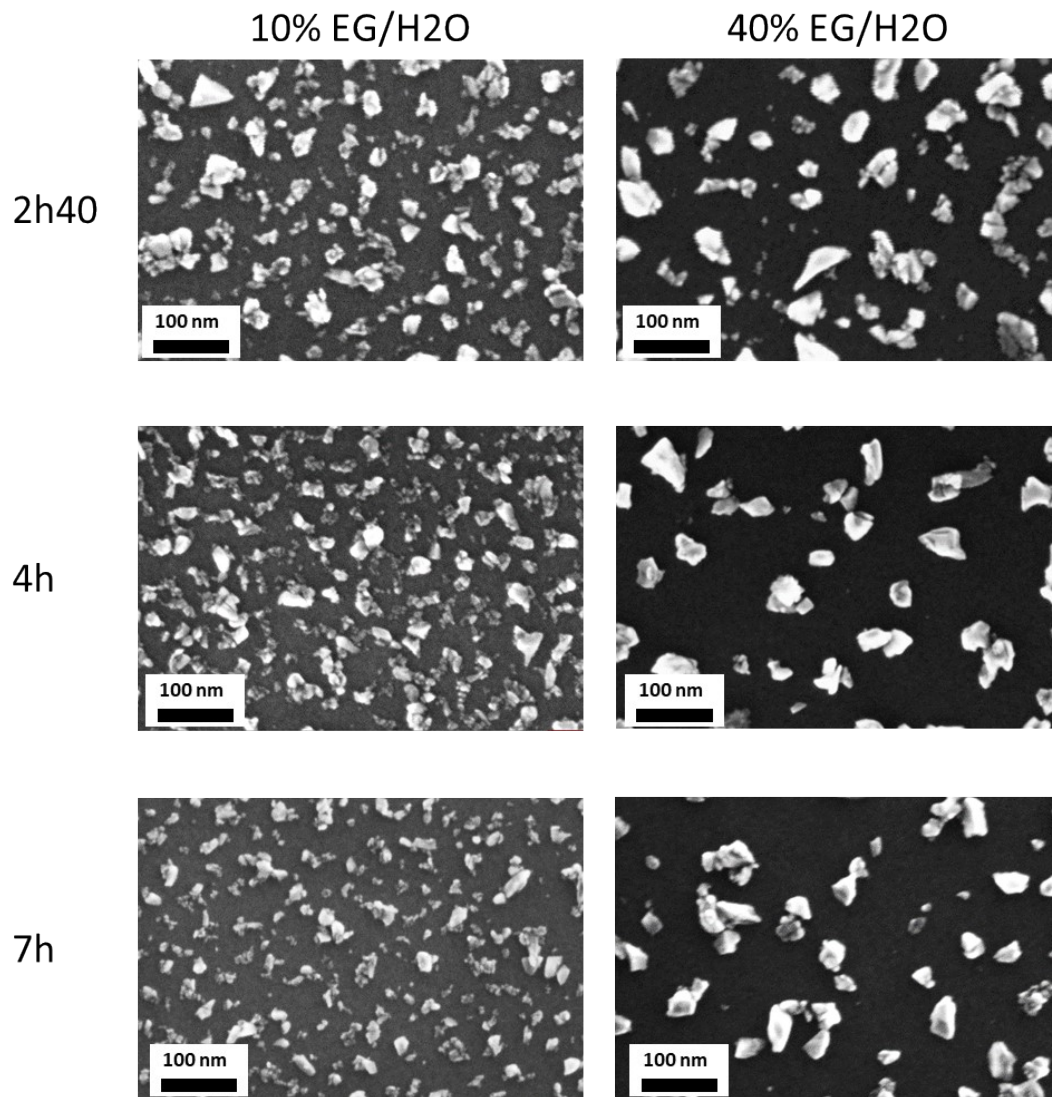

Figure S3 : Size sorting of Ox-MND (SYP 100) in a % EG/water viscosity gradient: influence of the centrifugation time (2h40 to 7h), the centrifugation speed is 2400 g. (left) SEM Pictures of 10 % EG/water phases; (right) SEM Pictures of 40 % EG/water phases.

| Duration | Speed        | Sample    | AR  | 10% EG | 40% EG | Pellet |
|----------|--------------|-----------|-----|--------|--------|--------|
| -        | -            | SYP30     | 839 | -      | -      | -      |
|          |              | SYP50     | 995 | -      | -      | -      |
|          |              | SYP100    | 734 | -      | -      | -      |
| 2h40     | 2400g        | Ox SYP100 | -   | 759    | 399    | -      |
| 4h       | 2400g        |           | -   | 878    | 329    | 168    |
| 7h       | 2400g        |           | -   | 657    | 315    | -      |
| 4h       | 1200g        |           | -   | 528    | 377    | -      |
| 4h       | 3600g        |           | -   | 229    | 312    | -      |
| 4h       | 2400g (50mL) |           | -   | -      | 517    | 300    |

Table S1 : number of counted particle for each size distribution

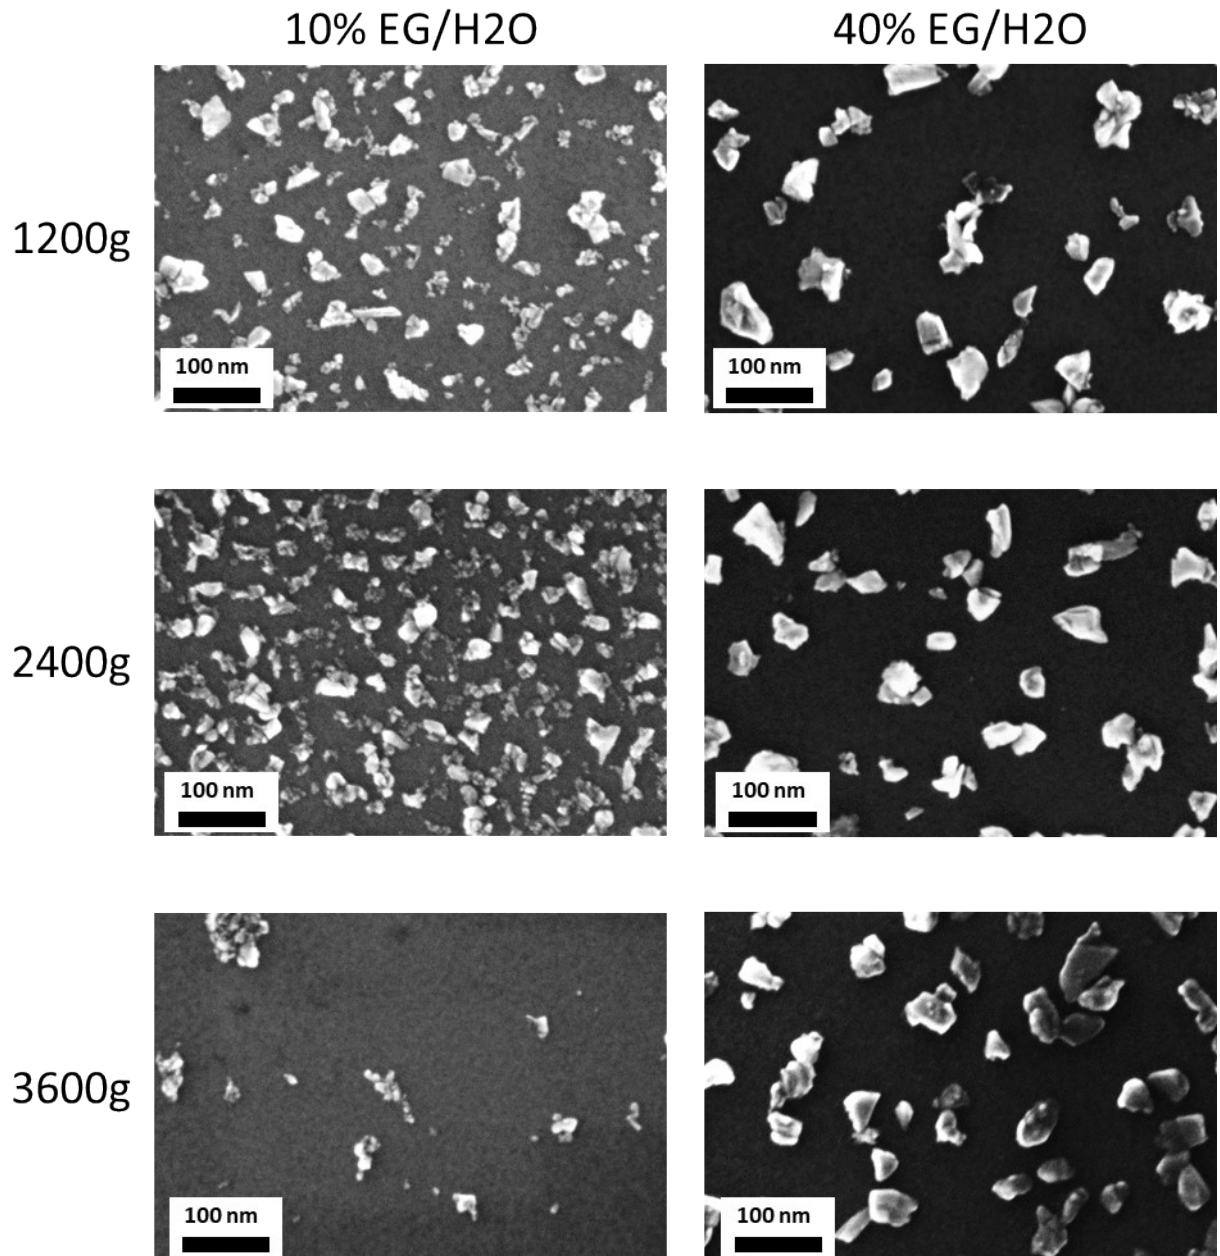

Figure S4 : Size sorting of Ox-MND (SYP 100) in a % EG/water viscosity gradient: influence of the centrifugation speed (1200g to 3600g), the centrifugation duration is 4h. (left) SEM Pictures of 10 % EG/water phases; (right) SEM Pictures of 40 % EG/water phases.

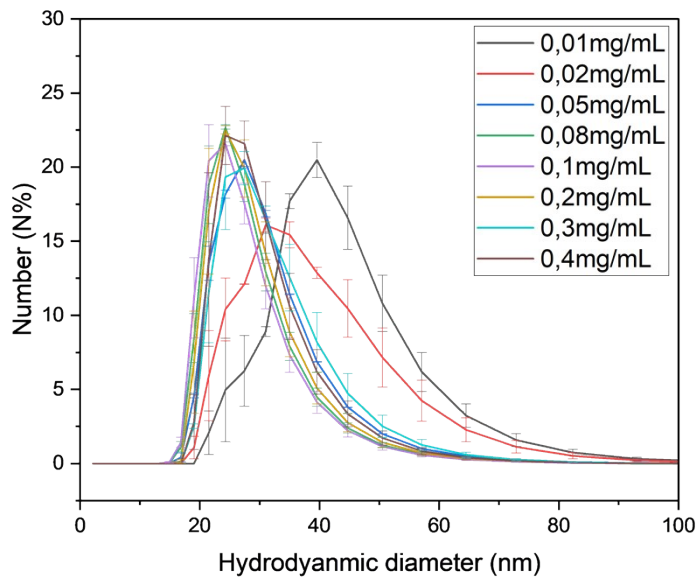

Figure S5 : Distribution of hydrodynamic diameters of oxidized SYP 100 nanodiamonds at various concentration obtained by DLS

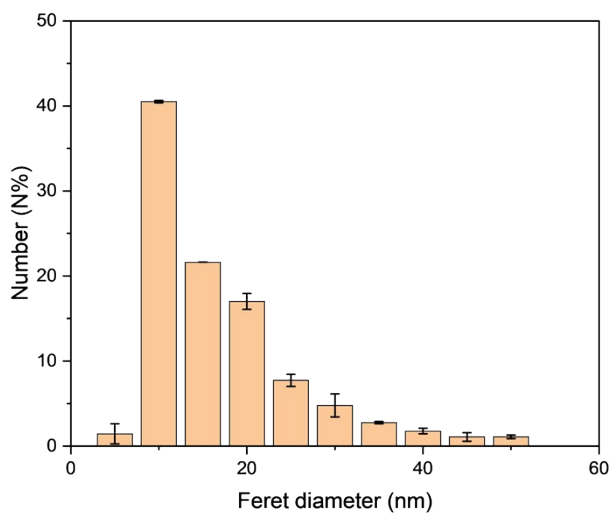

Figure S6 : Size distribution of oxidized SYP 100 nanodiamonds repeated independently to evaluate reproducibility of the counting method

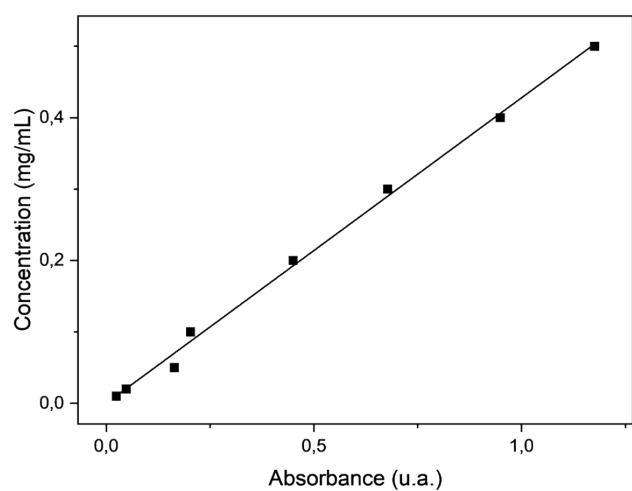

Figure S7 : Calibration curve of nanodiamond concentration as a function of absorbance measured by UV-Vis spectroscopy
